# Supplementary material for: C–H activation of a 2,2′-bipyridine ligand within (mono)pentamethylcyclopentadienyl lutetium complexes
Source: Royal Society of Chemistry journal article supplement (doi:10.1039/b405039h), 2004-01-01
Supplement: b405039h.doc [file b405039h.doc]

C-H activation of a 2,2'­bipyridine ligand within (mono)pentamethylcyclopentadienyl lutetium complexes

Thomas M. Cameron,* John C. Gordon, Brian L. Scott and William Tumas

Los Alamos National Laboratory, MS J-514, Los Alamos, USA.

General Methods

All reactions were conducted under a dry argon atmosphere using standard Schlenk techniques and all compounds were handled in a helium or argon-filled dry box. All solvents were distilled under argon from sodium or sodium benzophenone ketyl or passed over activated alumina, stored over molecular sieves, and degassed prior to use. The deuterated 2,2'­bipyridine was purchased from Aldrich. All NMR spectra were obtained on a Bruker Avance 300 with C6D6, C7D8, CD2Cl2, or *d*8-THF as solvents and referenced to residual solvent peaks unless otherwise noted. The 1H and 13C NMR resonances for **5** were assigned by standard COSY, HMQC,1 and HMBC.1,2 The HMBC and HMQC experiments were acquired on a Bruker Avance 400.

**[Cp*Lu(NHAr)(OCH(CH2SiMe3)C10H7N2)] (3)**: To a concentrated benzene solution of **1** (0.050g, 1.0 ml benzene) in a resealable NMR tube was added CO (ca. 15 psig) (the headspace was removed from the NMR tube by two freeze-pump-thaw cycles prior to CO addition). After 1 day crystals of **3** formed and were isolated by decanting the liquid from the NMR tube in 39 % yield. The conversion of **1** to **3** was quantitative as determined by NMR spectroscopy. The low yield of **3** was due to difficulty in crystallization. 1H NMR (C6D6, 25 °C, 300 MHz):  0.37 (9H, s, Si(C*H*3)3), 0.85 (6H, d, 7.0 Hz, NHAr*Pri* *Me*), 1.1 (2H, mult, C*H*2SiMe3), 1.37 (6H, d, 7.0 Hz, NHAr*PriMe*), 1.92 (15H, Cp**Me*), 3.23 (2H, sept, 7.0 Hz, NHAr*Pri* C*H*), 4.72 (N*H*), 5.80 (1H, d of d, 3*J*H-H = 3.3 Hz, 3*J*H-H = 11.5 Hz, OC*H*CH2SiMe3), 6.25 (1H, d of d, 6.0 Hz, 7.5 Hz, bipy proton), 6.9 (8H, ov, mult), 8.39 (1H, d, 4.5 Hz, bipy 6' proton). 13C NMR (C6D6, 25 °C, 300 MHz):  0.2, 11.1, 23.6, 25.0, 29.8, 30.1, 78.6, 113.8, 115.1, 117.0, 120.5, 122.6, 123.1, 124.8, 133.0, 138.7, 138.8, 150.7, 151.8, 153.9, 155.0, 179.9.

**[Cp*Lu(OC(SiMe3)=CH2)(OCH(CH2SiMe3)(C10H7N2))] (5)**: To a concentrated benzene solution of **2** (0.250 g, 5.0 ml benzene) in a resealable ampoule was added CO (ca. 15 psig) (the headspace was removed from the ampoule by two freeze-pump-thaw cycles prior to CO addition). After 3 days microcrystals of **5** formed and were isolated by decantation in 26 % yield. Generation of **5** from **2** was not quantitative as determined by NMR spectroscopy and the other products of this reaction have not yet been identified. The low yield is due to difficulty in crystallization as well as unidentified competing reactions. Single crystals of **5** were grown from a concentrated benzene solution. The in solution structure was confirmed by HMQC and HMBC NMR experiments. See Figure 1 for the full assignment for **5**. 1H NMR (C6D6, 25 °C, 400 MHz):  0.32 (9H, s, Si(C*H*3)3), 0.43 (9H, s, Si(C*H*3)3), 0.98 (d of d, 2*J*H-H = 13.5 Hz, 3*J*H-H = 11.0 Hz, C*H*2SiMe3), 1.16 (d of d, 2*J*H-H = 13.5 Hz, 3*J*H-H = 3.0 Hz, C*H*2SiMe3), 1.93 (15H, Cp**Me*), 4.63 (d, 1.0 Hz, C=C*H*2), 5.14 (d, 1.0 Hz, C=C*H*2), 5.77 (d of d, 3*J*H-H = 3.0 Hz, 3*J*H-H = 11.0 Hz, OC*H*CH2SiMe3), 6.60 (1H, mult), 6.78 (d, 8 Hz, bipy proton), 6.80 (d, 8 Hz, bipy proton), 6.87 (mult, bipy proton), 6.94 (mult, bipy proton), 6.98 (mult, bipy proton), 8.88 (d, 5.2 Hz, bipy proton). 13C NMR (C6D6, 25 °C, 400 MHz):  -0.8, 0.7, 11.2, 30.7, 78.5, 97.0, 115.2, 117.1, 120.7, 122.6, 124.5, 138.7, 139.1, 150.8, 151.5, 154.6, 176.8, 180.0.

Figure 1. Chemical shift assignment for **5**. 13C resonances are underlined.

**Selected 1H NMR data for 4:** 1H NMR (C6D6, 25 °C, 300 MHz):  -0.66 (1H, d, 2*J*H-H 11.5 Hz, LuC*H*2SiMe3), -0.48 (1H, d, 2*J*H-H 11.5 Hz, LuC*H*2SiMe3), 0.16 (9H, s, Si(C*H*3)3), 0.48 (9H, s, Si(C*H*3)3), 1.18 (2H, mult, OCHC*H*2SiMe3), 1.89 (15H, Cp**Me*), 5.74 (d of d, 3*J*H-H = 4.0 Hz, 3*J*H-H =10.0 Hz, OC*H*CH2SiMe3), 8.54 (1H, d, 5.0 Hz, bipy 6' proton).

**Sample preparation for reactions of 1 and *d*8­1 with CO:** Two resealable NMR tubes with equal volumes were used for the experiment. Each tube was charged with 1.37x10-5 mol of **1** or *d*8­**1** and 1.0 ml of C6D6. The samples were then degassed by three freeze­pump­thaw cycles. Once the samples had reached 25 °C (oil bath) *ca*. 15 psi CO was added to each. The progress of each reaction was monitored by NMR spectroscopy, at 30 minute intervals, for 8 hours. The samples were kept at 25 °C throughout the experiment.

**1H NMR Spectrum of isolated crystals of 3**:


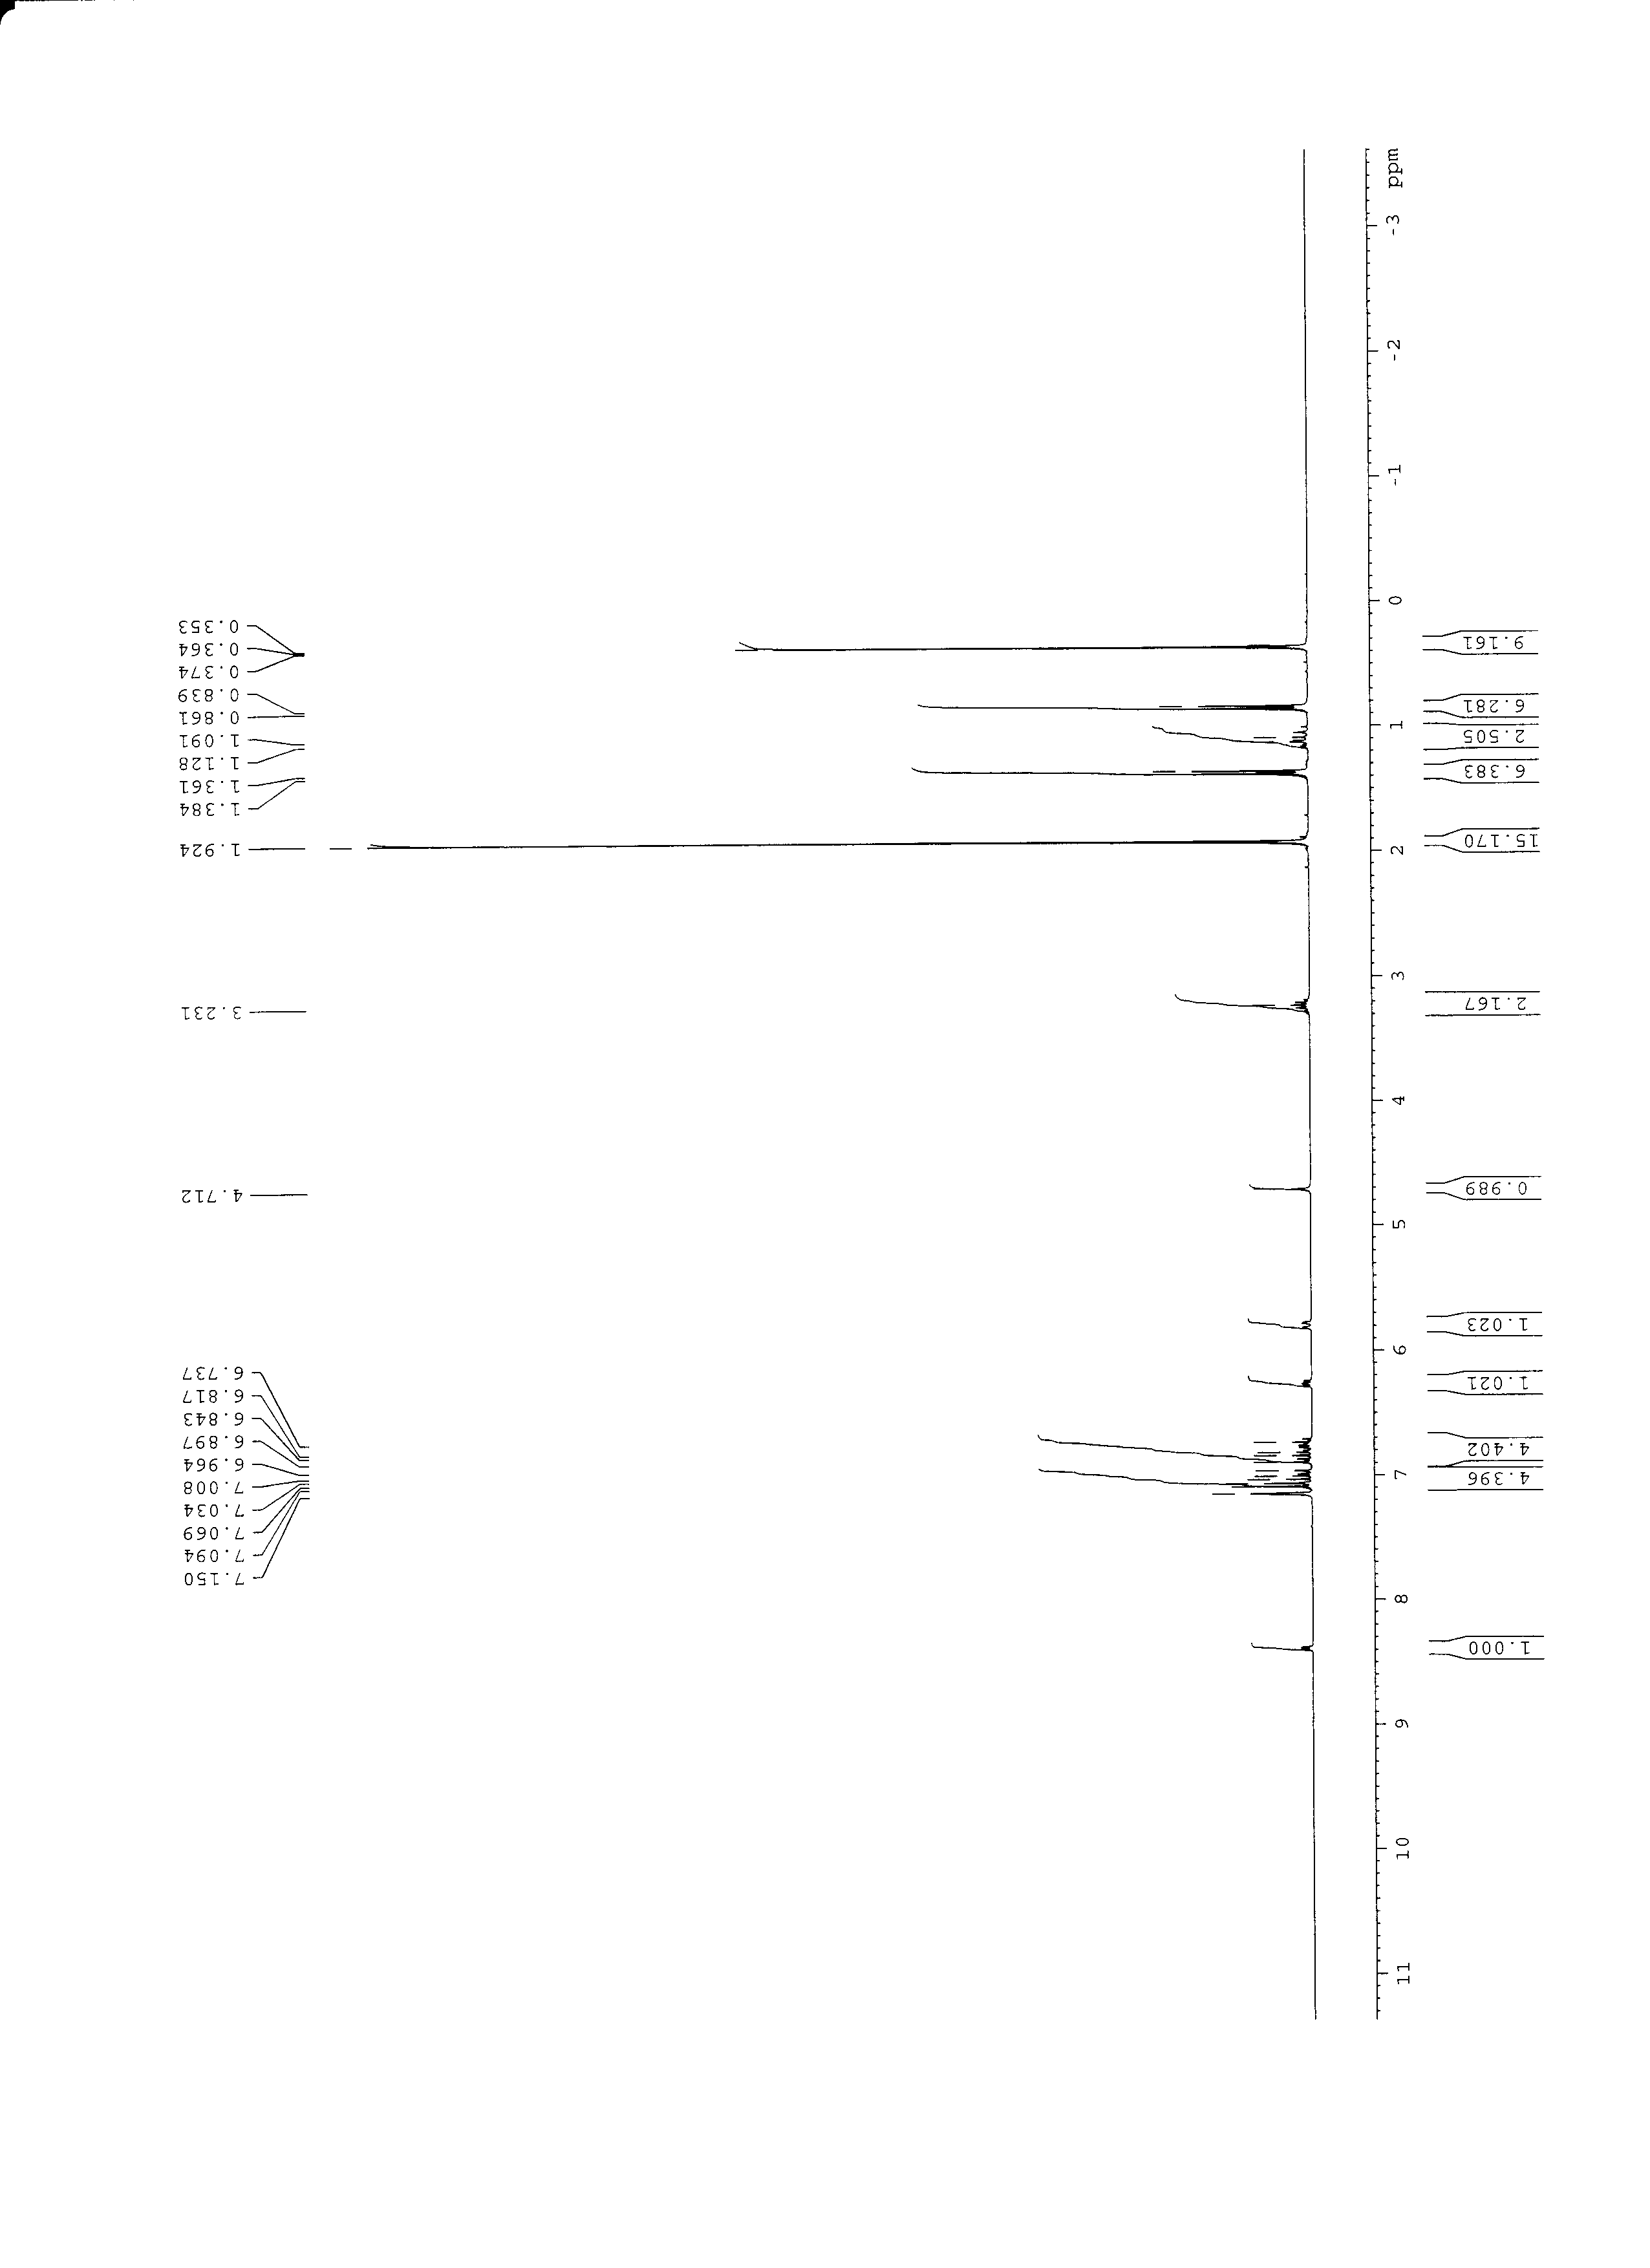


**1H NMR Spectrum of isolated crystals of 5**:


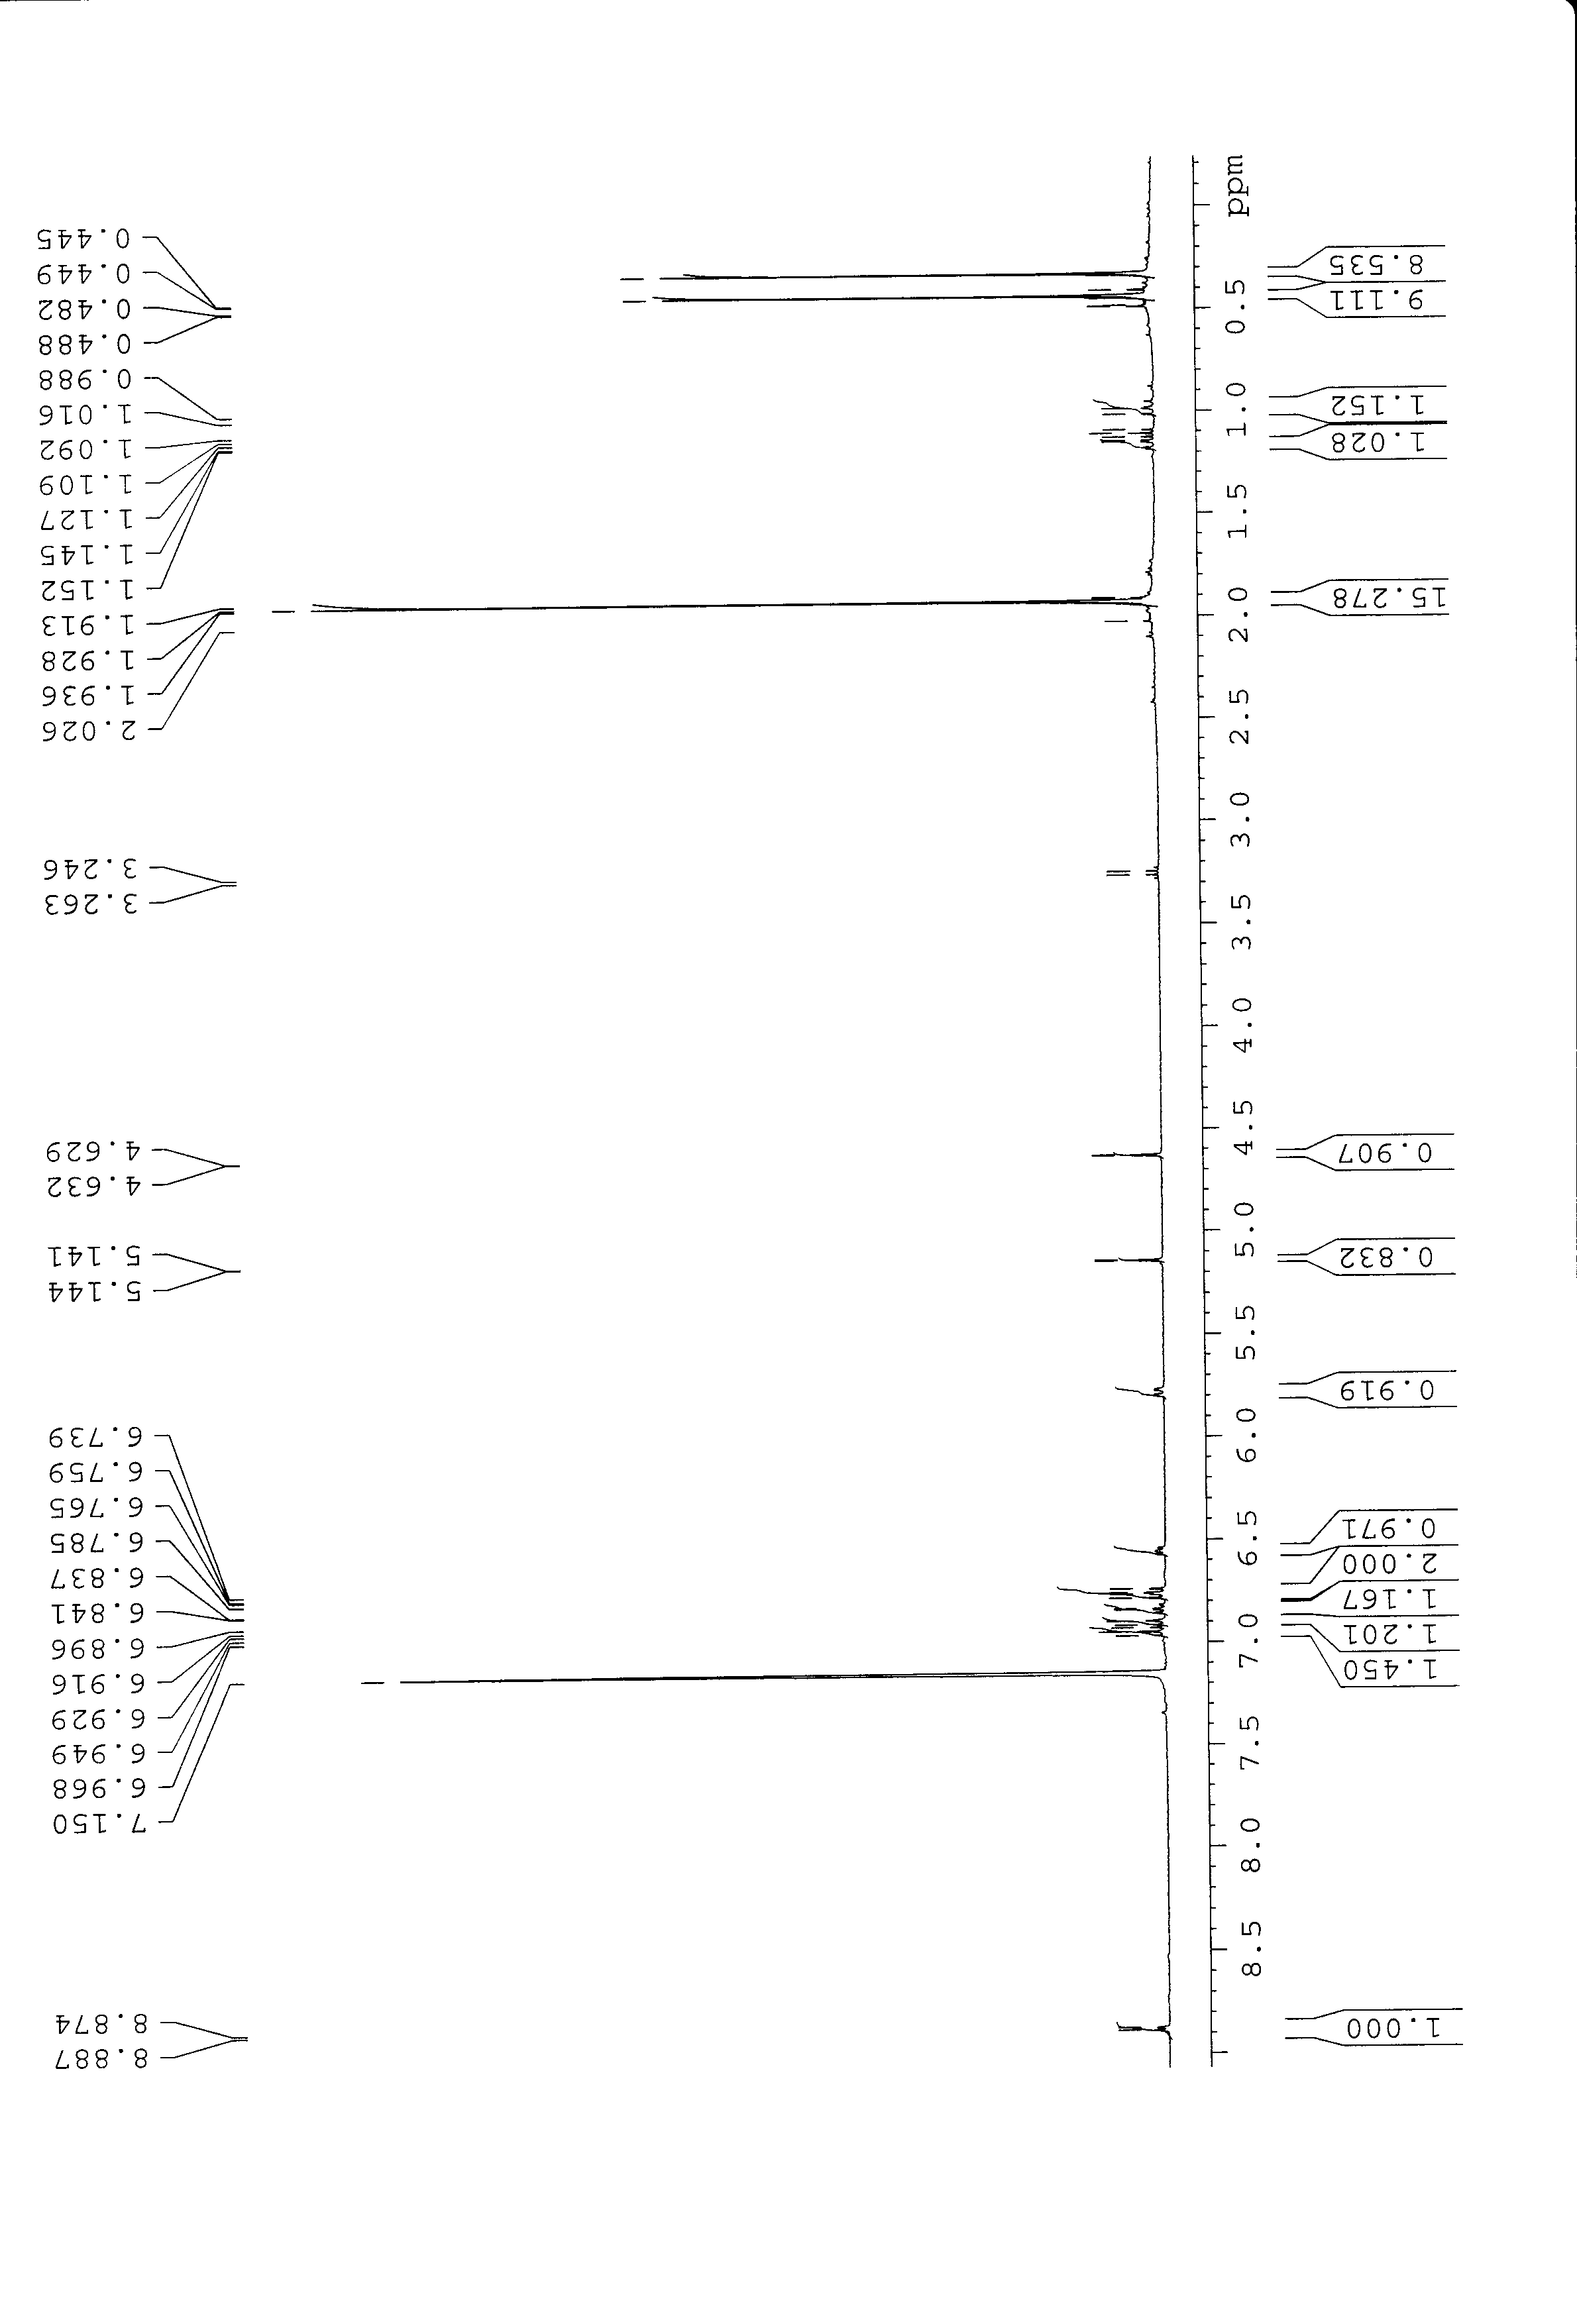


**References**

1 R. E. Hurd and B. K. John, *J. Mag. Reson.*, 1991, **91**, 648.

2 A. Bax and M. F. Summers, *J. Am. Chem. Soc.,* 1986, **108**, 2093.
